1 **Population analysis of *Vibrio cholerae* in aquatic reservoirs reveals a novel sister species**  
2 **(*Vibrio paracholerae* sp. nov.) with a history of association with human infections**

3

4 **Mohammad Tarequl Islam<sup>1</sup>, Tania Nasreen<sup>1</sup>, Paul Kirchberger<sup>2</sup>, Kevin Y. H. Liang<sup>1</sup>,**  
5 **Fabini Orata<sup>1</sup>, Fatema-Tuz Johura<sup>3</sup>, Monica S. Im<sup>4</sup>, Cheryl L. Tarr<sup>4</sup>, Munirul Alam<sup>3</sup> and**  
6 **Yann F. Boucher<sup>1,5</sup>\***

7 <sup>1</sup> Department of Biological Sciences, University of Alberta, Edmonton, Alberta T6G 2E9,  
8 Canada

9 <sup>2</sup> Department of Integrative Biology, University of Texas at Austin, Austin, Texas 78712, USA

10 <sup>3</sup> Infectious Diseases Division, International Centre for Diarrhoeal Disease Research, Bangladesh  
11 (icddr,b), Dhaka, Bangladesh

12 <sup>4</sup> National Center for Emerging and Zoonotic Infectious Diseases, Centers for Disease Control  
13 and Prevention, Atlanta, Georgia, USA

14 <sup>5</sup> Saw Swee Hock School of Public Health, National University of Singapore, Singapore

15

16 \*Corresponding Author: Yann F. Boucher (yboucher@ualberta.ca)

17

18

19

20

21

22

23 **Key words: *Vibrio cholerae*, cholera, novel species, pandemic, diversity**

24 **Running title:** Intra-species diversity of *Vibrio cholerae*

25 **Abstract**

26 Most efforts to understand the biology of *Vibrio cholerae* have focused on a single group, the  
27 pandemic-generating lineage harbouring the strains responsible for all known cholera pandemics.  
28 Consequently, little is known about the diversity of this species in its native aquatic environment.  
29 To understand the differences in the *V. cholerae* populations inhabiting in regions with varying  
30 history of cholera cases and how that might influence the abundance of pandemic strains, a  
31 comparative analysis of population composition was performed. Little overlap was found in  
32 lineage compositions between those in Dhaka (cholera endemic) located in the Ganges delta, and  
33 of Falmouth (no known history of cholera), a small coastal town on the US East Coast. The most  
34 striking difference was the presence of a group of related lineages at high abundance in Dhaka  
35 which was completely absent from Falmouth. Phylogenomic analysis revealed that these lineages  
36 form a cluster at the base of the phylogeny of *V. cholerae* species, sufficiently differentiated  
37 genetically and phenotypically to form a novel species. Strains from this species have been  
38 anecdotally isolated from around the world and were isolated as early as 1916 from a British  
39 soldier in Egypt suffering from choleraic diarrhoea. In 1935 Gardner and Venkatraman  
40 unofficially referred to a member of this group as *Vibrio paracholerae*. In recognition of this  
41 earlier designation, we propose the name *Vibrio paracholerae*, sp. nov. for this bacterium.  
42 Genomic analysis suggests a link with human populations for this novel species and substantial  
43 interaction with its better-known sister species.

44

45 **Importance**

46 Cholera continues to remain a major public health threat around the globe. Understanding the  
47 ecology, evolution and environmental adaptation of the causative agent *Vibrio cholerae* and  
48 tracking the emergence of novel lineages with pathogenic potential are essential to combat the  
49 problem. In this study, we investigated the population dynamics of *Vibrio cholerae* in an inland  
50 locality which is known as endemic for cholera and compared with that of a cholera free coastal  
51 location. We found the consistent presence of the pandemic generating *V. cholerae* in cholera-  
52 endemic Dhaka and an exclusive presence of a lineage phylogenetically distinct from other *V.*  
53 *cholerae*. Our study suggests that this lineage represents a novel species having pathogenic  
54 potential and a human link to its environmental abundance. The possible association with human  
55 population, co-existence and interaction with toxigenic *V. cholerae* in the natural environment  
56 make this potential human pathogen an important subject for future studies.

57

58

## 59 **Introduction**

60 *Vibrio cholerae* is the causative agent of cholera, the disease which has shaken human  
61 civilization from the last few centuries and continues to be a public health threat, especially to  
62 the developing world (1, 2). Its pathogenesis and epidemiology have been extensively studied,  
63 but the aquatic part of its life cycle is still not fully understood. Even though *V. cholerae* is a well  
64 defined, model species for microbial ecology research, strikingly, few close relatives have been  
65 found for this species in recent years, most being initially classified as *V. cholerae*-like bacteria.  
66 One of them was occasional human pathogen *Vibrio mimicus*, which was proposed as a new  
67 species in 1981 based on phenotypic characteristics (3). Later, genome-based studies established  
68 the molecular basis of its importance as a pathogen, close association and exchange of important  
69 virulence genes with *V. cholerae* (4, 5). Two other closely related novel species, *Vibrio parilis*  
70 and *Vibrio metoecus*, were more recently isolated alongside *V. cholerae* from coastal waters (6,  
71 7) and found to exchange genetic material with *V. cholerae* in aquatic environments (6, 8).  
72 Biological information on the close relatives of a dangerous environmental pathogen like *V.*  
73 *cholerae* is of significance, because of their potential as emerging pathogens themselves and  
74 their interaction with *V. cholerae* in its natural habitats. Even though this diverse species is  
75 ubiquitous in tropical and temperate coastal waters world-wide, cholera is only caused by a  
76 specific lineage of *Vibrio cholerae*, in which the O1 antigen is ancestral (9, 10). It is not clear  
77 whether aquatic *V. cholerae* maintains a significantly different population structure in cholera  
78 endemic and non-endemic areas, and if this structure is influenced by co-occurring species. This  
79 is a crucial gap in our understanding of the factors defining cholera endemicity and driving local  
80 and global biogeographic dispersal patterns of *V. cholerae*. It has recently become possible to  
81 investigate the details of the population structure of *V. cholerae* and its close relatives, using a

82 molecular marker based on a single copy housekeeping gene (*viuB*, vibriobactin utilization  
83 protein subunit B), which provides subspecies level resolution (11). This method was used to  
84 study a cholera-free region on the east coast of the USA, the Oyster Pond ecosystem (Falmouth,  
85 USA), where differences in abundance of individual alleles in particular locations/habitats  
86 indicated potential adaptation to ecological conditions at the subspecies level (11, 12). A similar  
87 study was performed in *V. cholerae* populations in an inland location (Dhaka) in cholera-  
88 endemic Bangladesh (11, 13).

89 Here, to understand the role played by subspecies population structure in disease, we compared  
90 the *V. cholerae* population from inland Bangladesh with that from the east coast of the USA.  
91 This revealed that distribution and abundance of major lineages of *V. cholerae* differed  
92 significantly in the two distinct ecosystems. Both globally distributed as well as locally adapted  
93 lineages of *V. cholerae* are found in the two environments studied. One of the most striking  
94 differences was the presence of several related lineages in Dhaka forming a divergent clade at  
95 the base of the *V. cholerae* species in a phylogenomic analysis, which were completely absent in  
96 the coastal USA location. Genomic characterization of these lineages reveals that they form a  
97 novel species closely related to but distinct from *V. cholerae*. A revision of recent and decades  
98 old historical isolates related to this novel species indicates that it has been found in similar  
99 environments to pandemic *V. cholerae* for decades and is associated with human infections  
100 ranging from septicaemia to choleraic diarrhea.

101

## 102 **Results and Discussion**

103 **Pandemic related strains increase total *V. cholerae* abundance in Dhaka and reduce local**  
104 **diversity**

105 One of the main differences between the *V. cholerae* populations from Oyster Pond (Falmouth,  
106 USA) and Dhaka (Bangladesh) is, unsurprisingly, the abundance of the pandemic generating  
107 (PG) lineage, which includes strains responsible for the current 7<sup>th</sup> pandemic. Water samples  
108 were previously collected biweekly from seven different sites in the water bodies surrounding  
109 Dhaka city for nine continuous months (from June, 2015 to March, 2016), as well as a  
110 population from Oyster Pond over the summers of 2008 and 2009 in Cape Cod, Falmouth on the  
111 USA east coast (12). Here we compare the *V. cholerae* populations from these two areas to gain  
112 insights on the differences between a region that is non-endemic for cholera and experiences  
113 strong seasonal variation, with a tropical area endemic for the disease. High-throughput  
114 sequencing of *viuB* marker gene amplicons was used to analyse the subspecies composition of *V.*  
115 *cholerae* in these two populations. Amplicons of this gene were annotated following a previously  
116 established scheme (11), in which diversity within the *V. cholerae* species is measured based on  
117 relative abundance and distribution of *viuB* alleles. Each allele represents a *V. cholerae* lineage,  
118 the diversity of which is roughly equivalent to that of a clonal complex as traditionally defined  
119 by Multi-locus Sequence Typing (11). A single *viuB* allele (*viuB-73*) can be found to be uniquely  
120 associated with the pandemic generating (PG) lineage which is mostly composed of *V. cholerae*  
121 *O1* strains (11). Abundance and distribution of *viuB* alleles in samples collected from the two  
122 locations were estimated from *viuB* amplicon sequencing data normalized by quantitative data of  
123 *viuB* gene copy numbers determined by qPCR (14). Total abundance of *V. cholerae* in the two  
124 locations varied significantly (Kruskal-Wallis test,  $p < 0.1$ ), being almost twice as high on average  
125 in Dhaka ( $2.3 \times 10^5$  gene copies/litre) than in Oyster Pond ( $1.25 \times 10^5$  gene copies/litre) (**Fig.**  
126 **1A**). However, when PG *V. cholerae* O1 (*viuB-73*) were excluded (quantified independently of  
127 other lineages using qPCR of the *rfbO1* gene), average abundance was very similar in the two

128 locations (Kruskal-Wallis,  $p < 0.01$ ). The PG lineage was the predominant genotype in Dhaka,  
129 with an average abundance of  $1.4 \times 10^5$  *rfbO1* gene copies/litre, whereas it was just a minor  
130 member of the population in Oyster Pond, with an average abundance of  $1.5 \times 10^4$  gene  
131 copies/litre (**Fig. 1A**). qPCR analysis confirmed that PG *V. cholerae* O1 present in the Oyster  
132 Pond population were non-toxicogenic (CTX negative), as opposed to the vast majority of PG *V.*  
133 *cholerae* O1 in Dhaka being toxicogenic (CTX positive) (14). Similarity percentage (SIMPER)  
134 analysis based on Bray Curtis dissimilarity suggests that the allele most responsible for the  
135 overall dissimilarities between Dhaka and Oyster Pond is indeed *viuB-73*. This allele was  
136 predominant throughout the nine month sampling period in Dhaka (13), constituting around 60%  
137 of the total *V. cholerae* population on average whereas its presence was stochastic in Oyster  
138 Pond, with around 5% of the total population (11). Population structure indices (Diversity and  
139 Evenness) were significantly lower in Dhaka than in Oyster Pond (Kruskal-Wallis test,  $P < 0.1$ )  
140 (**Fig. 1B**). This indicates a more stable and diverse *V. cholerae* community structure in the  
141 coastal location and a less diverse community dominated by fewer alleles in inland Bangladesh  
142 (Dhaka), likely because of the dominance of *viuB-73* in that environment.

143 Dhaka's aquatic reservoirs therefore seems to harbour a *V. cholerae* community highly  
144 dominated by the PG lineage that is most likely to be affected substantially by human activity. It  
145 is one of the most densely populated megacities in the world and has long history of suffering  
146 from recurring cholera (15). Sustainance of the cholera causing genotype (PG) in the environment  
147 could be the driving factor to shape the overall population of *V. cholerae* in Dhaka. The  
148 reduction of intra-species diversity by PG *V. cholerae* in cholera endemic Dhaka could be  
149 attributed to the potential selective advantage of colonizing human gut (16), which would result  
150 in a constant output to water reservoirs. Type six secretion-mediated killing could also lead to the

151 reduction of diversity, giving advantage to PG *V. cholerae* in a resource limited competitive  
152 environment, where PG is a superior competitor to other strains at higher temperatures (17, 18).  
153 Environmental conditions, i.e. the lower salinity seen in Dhaka (**Supplementary Table 1**) could  
154 also advantage PG strains over others, as they have been shown to be more prevalent in low salt  
155 environments relative to other lineages (11).

156

### 157 **A novel divergent lineage is endemic to inland Bangladesh**

158 Besides the PG lineage, the population composition of *V. cholerae* sampled over 6 to 9 months  
159 was strikingly different in Dhaka and Oyster Pond. This was determined by using the abundance  
160 and distribution data of individual *viuB* alleles from the two locations. Non-metric multi  
161 dimensional scaling (NMDS) was performed to compare the two communities and statistical  
162 significance of community structure dissimilarity was evaluated using the analysis of similarity  
163 (ANOSIM) with a Bray-Curtis distance matrix. In the NMDS plot, samples from Dhaka and  
164 Oyster Pond clustered separately and community structure dissimilarity was statistically  
165 significant (ANOSIM  $R=0.75$ ,  $P$  value  $<1\%$ ) (**Fig. 2**). Only two major alleles were shared  
166 between these locations from a total of 13 *viuB* alleles in Dhaka and 15 alleles in Oyster pond  
167 (each individual allele constituting at least 1% of the *V. cholerae* population). The most abundant  
168 alleles in Dhaka after *viuB-73* were *viuB-06*, *viuB-07*, *viuB-25* and *viuB-05* (**Fig. 3**). Of these  
169 four, three are exclusively found in Dhaka (*viuB-05*, *viuB-06* and *viuB-07*) and are of particular  
170 interest. Together, they composed ~15% of the average Dhaka *V. cholerae* population and have  
171 been found to display higher abundance in sites surrounded by a high human population density  
172 and levels of pollution (13).

173



174 To have more information on the lineages found in Dhaka, 23 *V. cholerae* strains isolated from  
175 the city during the study period were selected for whole genome sequencing: nine *V. cholerae*  
176 O1 harbouring the *viuB*-73 allele and fourteen *V. cholerae* non-O1/O139 isolates displaying a  
177 diversity of *viuB* alleles. Four strains possessed *viuB* alleles 05, 06, 07 and 08 (EDC690,  
178 EDC716, EDC717 and EDC792) and were found to be part of a very long branch occupying a  
179 basal position in a global core genome phylogeny compared to the rest of the *V. cholerae* strains  
180 (hence termed Long Branch clade or LB) (**Fig. 4**). This phylogenetic group has not been  
181 described in any other studies, although other strains from public databases, isolated from  
182 different parts of the world, also belong to it. Nine isolates were recovered from human clinical  
183 specimens across the United States and reported to the Centre for Disease Control (CDC) as part  
184 of the surveillance conducted under the Cholera and Other *Vibrio* Illness Surveillance (COVIS)  
185 program (19). Two more isolates originate from stool samples of diarrheal patients in  
186 Mozambique in 2008 (20) and one isolate was recovered from a diarrheal patient from Thailand  
187 in 1993 and described as *V. cholerae* serogroup O155 (21). Seven additional isolates have been  
188 found to belong in the clade for a total of twenty-three as of August 2019 (**Supplementary**  
189 **Table 2**).

190

### 191 **A sister species to *Vibrio cholerae*?**

192 Comparative genome analysis suggests that LB isolates represent a new species, which would be  
193 the closest relative of *V. cholerae* described to date. Based on the genome sequences, G+C  
194 content of the strains belonging to LB clade was 46-48.1%, falling within the known range of the  
195 genus *Vibrio*. The genomes of twenty-two LB isolates were compared with a set of *V. cholerae*

196 strains containing the same number (n=22) of representatives from both pandemic and non-  
197 pandemic lineages (**Supplementary Table 2**). This comparison revealed that genetic distance  
198 between LB strains and *V. cholerae* fall below or at the threshold of the species cut-off values.  
199 Indeed, Digital DNA-DNA hybridization (dDDH) values ranged from 82-100% within the LB  
200 clade and 69-70% with *V. cholerae*, whereas Average Nucleotide Identity (ANI) values ranged  
201 from 97-100% within the group and 95-96% with *V. cholerae* strains, respectively  
202 (**Supplementary File 1**). DDH values are considered to be the gold standard for species  
203 designation and a value of  $\leq 70\%$  presents as an indication that the tested organism belongs to a  
204 different species than the type strain(s) used as reference (22). ANI has been proposed as an  
205 alternative genomic statistics to DDH and the cut off values of 95-96% has been used for species  
206 delineation (23). In this case, all the strains from the LB clade had a dDDH value of 69% and  
207 ANI value of 96% when compared with *V. cholerae* type strain N16961. Thus, according to the  
208 current species definition (24), the LB clade meets the genotypic criteria to qualify as a candidate  
209 for a novel species designation. It also meets the phylogenetic criteria, as it represents a well-  
210 defined, well-supported monophyletic clade (**Fig. 4**).

211 Very recently, genome sequencing efforts of a historical collection of isolates from cholera or  
212 cholera-like diseases have identified a strain isolated during the first World War (in 1916) from a  
213 soldier convalescent in Egypt as a divergent *V. cholerae* (25). This NCTC30 strain actually  
214 belongs to the LB clade found in this study (**Fig. 5**). Interestingly, NCTC30 was initially  
215 designated as “*Vibrio paracholerae*” and the disease caused was described as choleraic and  
216 termed as ‘paracholera’ (26). To honour its history, we propose the name *Vibrio paracholerae*  
217 sp. nov. (EDC-792<sup>T</sup>) for this novel species..

218 To confirm that *V. paracholerae* sp. nov. was indeed a novel species, its phenotypic traits were  
219 compared to those from the most closely related species: *V. cholerae* and *V. metoecus*. Their  
220 ability to catabolise 190 different carbon sources and response to 96 chemicals and  
221 antimicrobials were determined using Biolog Phenotypic Microarray (PM) plates. Four *V.*  
222 *paracholerae* strains were examined, two of environmental origin in Bangladesh (EDC 690,  
223 EDC792) and two from clinical sources in the USA (2016V-1114, 2016V-1091). These were  
224 compared with four *V. cholerae* (N16961, V52, YB3B05, YB8E08) and four *V. metoecus* strains  
225 (082459, OP6B, OP4B, OP3H). Although the *V. paracholerae* sp. nov. strains resembled *V.*  
226 *cholerae* in most biochemical and growth characteristics, they clearly differed for some  
227 phenotypic characteristics (**Table 1**). All four *V. paracholerae* sp. nov. strains tested could  
228 utilize  $\alpha$ -cyclodextrin as a sole carbon source, whereas none of the tested *V. cholerae* strains  
229 could. Cyclodextrin utilization requires a specific category of amylases, which has not been  
230 reported in *V. cholerae* so far (27). *In silico* analysis revealed that *V. paracholerae* strains  
231 possess a gene cluster (genes 03367 to 03379 in the NCTC30 genome, NZ\_LS997867)  
232 containing homologs of genes encoding cyclomaltodextrin glucanotransferase (*amyM*), ABC  
233 transporter MalK (*malK*), glycosidase MalE (*malE*), glucosamine N-acetyltransferase,  
234 cyclodextrin specific porin (*cycA*), cyclodextrin binding protein (*cycB*), cyclodextrin transport  
235 system permease (*malF*), cyclodextrin transport system permease (*malD/malG*) and  
236 neopullulanase (*nplT*) (**Table 2**). Only two (9%) *V. cholerae* strains in our dataset (n=22) and a  
237 similar percentage in the NCBI database possessed this cluster whereas 100% of the *V.*  
238 *paracholerae* sp. nov. strains (n=22) harboured it. This cluster might be associated with the  
239 cyclodextrin degradation phenotype, as reported previously (28). In contrast with *V. cholerae*,  
240 75% (3 out of 4) of *V. paracholerae* sp. nov. strains tested were found to be lacking the ability to

241 utilize D-mannose, L-aspartic acid, citric acid, alpha keto glutaric acid and mono-methyl  
242 succinate (**Table 1**). D-mannose was found to be readily utilized by both *V. cholerae* and *V.*  
243 *metoecus* tested in this study and previous literature reported that ~80% of *V. cholerae* are  
244 capable of utilizing this sugar (3). The gene cluster encompassing *manP* to *manA* (VC1820 to  
245 VC1827 in N16961 genome, AE008352.1), including the well-known mannose-6 phosphate  
246 isomerase (*manA*) gene required for this process (29), was present in all the tested *V. cholerae*  
247 (n=22) and *V. metoecus* (n=4) strains, whereas it was found in only ~40% (9/22) of *V.*  
248 *paracholerae* sp. nov. strains (**Table 2**). We could not find the genetic basis for the other  
249 phenotypic differences between *V. paracholerae* sp. nov. and *V. cholerae*. *V. paracholerae* is  
250 similar to *V. cholerae* in N-Acetyl-D-Galactosamine and D-glucuronic acid utilization tests and  
251 acetoin production, which differentiates both species from *V. metoecus* (7). Resistance to 96  
252 drugs or metals were also tested at different concentrations, and *V. cholerae* and *V. paracholerae*  
253 sp. nov. showed similar profiles in most, although three chemicals elicited differential responses  
254 by the two species. *V. paracholerae* sp. nov. strains were resistant to cadmium chloride, sodium  
255 selenite and dichlofluanid in contrast to the sensitivity of the *V. cholerae* strains towards those  
256 chemicals (**Supplementary Table 3**). These differences in carbon source utilization capability  
257 and response to antimicrobial chemicals could be crucial in defining the ecological preferences  
258 of *V. paracholerae* sp. nov. and interactions with its more famous sister species.

259

## 260 **A potential threat to humans?**

261 To be a successful disease-causing agent to humans, a bacterial pathogen of aquatic origin needs  
262 to have the ability to survive in the environment and colonize the human body. In cholera

263 endemic Dhaka, *V. paracholerae* sp. nov. has been found to exist abundantly in local water  
264 reservoirs. In one particular site, the number even surpassed that of PG *V. cholerae*, which was  
265 otherwise the most predominant lineage found in Dhaka (13). That site (Kamrangir char)  
266 happened to be the most densely populated region among those sampled, indicating a possible  
267 link between human population and the prevalence of *V. paracholerae* sp. nov. This raises the  
268 possibility of adaptation to the human gut as an alternate niche and an important factor in its  
269 ecology. Association of the members of the species with cholera-like cases, such as in the case  
270 of the historical strain NCTC30, and isolation from clinical/human stool samples from different  
271 parts of the world would suggest their pathogenic potential to humans. To assess this potential,  
272 *V. paracholerae* sp. nov. strains were screened for the presence of known virulence-related genes  
273 and islands often found in *V. cholerae* (**Supplementary Table 4**). *V. paracholerae* sp. nov.  
274 strains lack CTX, VPI1 and VPI2; three major elements known to be essential for *V. cholerae* to  
275 cause cholera (2). They also lack a cluster of genes (VC1692, VC1694, VC1719 and VC1720 in  
276 the N16961 genome) encoding proteins for the ‘Tor operon’ required for trimethylamine N-oxide  
277 respiration in *V. cholerae*. The genes in this operon have been shown to be crucial for cholera  
278 toxin production, cytotoxicity and intestinal colonization of *V. cholerae* in infant mouse model  
279 (30). The Tor operon was found in 100% of *V. cholerae* (n=22) and *V. metoecus* (n=4) strains in  
280 our dataset, which indicate that it was likely lost in the *V. paracholerae* sp. nov. phylogenetic  
281 branch, possibly impacting their interaction with eukaryotes and distinguishing it from its sister  
282 species.

283 All the *V. paracholerae* sp. nov. strains in our dataset possessed the RTX toxin gene cluster, a  
284 virulence factor for *V. cholerae* known to have a role in interaction with eukaryotes (31).  
285 Interestingly, five *V. paracholerae* sp. nov. strains (22%) (including NCTC30) possess Type

286 Three Secretion System genes, an established virulence factor for non-pandemic *V. cholerae*  
287 (32). Six strains possessed an SXT element, which is found in most PG *V. cholerae* strains since  
288 2001 and is believed to be involved in improved fitness in 7<sup>th</sup> pandemic El Tor *V. cholerae* (9,  
289 33). Additionally, 50% of the *V. paracholerae* sp. nov. strains also contained genes for the  
290 recently discovered cholix toxin, thought to be an important virulence factor for *V. cholerae* (34).

291 Apart from the known virulence genes usually found in *V. cholerae*, gene content analysis  
292 revealed a few species-specific genetic traits in *V. paracholerae* sp. nov. Two genes were present  
293 in all 22 *V. paracholerae* sp. nov. strains, with no homolog found in any *V. cholerae* strains.  
294 These two genes encode a lysR family transcriptional regulator (WP\_001924807.1) and  
295 HAD\_IB family hydrolase (WP\_071179638.1). Both of these genes are part of a previously  
296 reported genomic island (GI-66) found in *V. albensis* (35). This GI contains iron-related  
297 regulatory genes that can be significant in regulation of iron scavenging in this group of  
298 organisms. Iron acquisition is thought to be an important aspect for regulation of virulence as  
299 well as host selectivity/ specificity (36) . Most (90%) of *V. paracholerae* sp. nov. strains also  
300 harboured a novel RND efflux pump (**Table 2**), thought to be critical for intrinsic and induced  
301 antimicrobial resistance, virulence gene expression, colonization in animal host and  
302 environmental regulation of stress response (37). Efflux pumps have been proposed to be  
303 important for expelling bile out of the cell, and the resulting bile resistance would be key to  
304 overcoming this challenge inside the human gut (38). RND efflux pumps have specifically been  
305 found to confer increased bile resistance in other gram negative bacteria (39). The novel RND  
306 gene cluster is absent in both *V. cholerae* and *V. metoecus* but homologs have been found in the  
307 halophilic bacteria *V. cincinnatiensis* (40) and a bile associated isolate of *V. fluvialis* (41). Other  
308 than efflux pumps, ToxR and TolC have been proposed to be crucial for bile resistance, and like

309 *V. cholerae* strains, all the *V. paracholerae* sp. nov. strains possess both genes. All these factors  
310 make *V. paracholerae* sp. nov. a potential candidate for a species adapted to the human gut and  
311 underscores the importance of studying their biology in greater detail.

312

313 **Interaction of *Vibrio paracholerae* sp. nov. with pandemic *Vibrio cholerae* impacts the**  
314 **ecology and evolution of both species**

315 Horizontal gene transfer (HGT) among species sharing an ecological niche can have a major  
316 impact on their evolution (42). As *V. paracholerae* sp. nov. (VP) co-exists with *V. cholerae* (VC)  
317 in natural ecosystems (at least in Dhaka), it is expected that HGT could take place between these  
318 two groups. To assess the propensity of interspecies HGT, potential gene transfer events within  
319 two groups (VC and VP) were inferred based on phylogenetic congruence of individual genes.  
320 Maximum likelihood (ML) trees were constructed for each of the core and accessory gene  
321 families present in at least two strains from each group. A gene transfer was hypothesized if a  
322 member of a group clustered with members of the other group in a clade, and the gene tree could  
323 not be partitioned into perfect clades, which must consist of all members from the same group  
324 and only of that group (8, 43). In our groups of 22 VC and 22 VP strains, 216 HGT events were  
325 hypothesized involving 82 gene families from VC to VP, but only 62 events from VP to VC  
326 involving 33 gene families. All of the core genes transferred from VP to VC were acquired by  
327 strains outside of the PG group. In the case of accessory genes, we could infer 82 potential  
328 transfer events from VC to VP and 54 events from VP to VC. Only 4 events involved strains  
329 belonging to the PG clade. Thus, gene transfer directionality was biased from VC to VP, VP  
330 being the recipient of HGT in most cases. Lower rate of HGT towards *V. cholerae* was

331 previously reported in case of the co-occurring *V. metoecus*, which has a lower abundance in the  
332 environment (8). This gene transfer bias could be attributed to the dominance of *V. cholerae* in  
333 cholera endemic region, as it is generally more abundant than *V. paracholerae* sp. nov. and  
334 therefore more likely to be a DNA donor (14). Among the accessory genes transferred from *V.*  
335 *cholerae* to *V. paracholerae* sp. nov., there were proteins related to O antigen synthesis, T6SS,  
336 iron regulation, chaperone and multi-drug resistance and putative metabolic functions. There are  
337 examples of a single gene or even a small set of nucleotides within a gene acquired via HGT  
338 impacting the ecology and pathogenicity of bacterial lineages (42, 44). Thus, the HGT events in  
339 *V. paracholerae* sp. nov. underscore the possibility for species co-existing with PG *V. cholerae*  
340 to acquire virulence and fitness-related genes to become pathogenic to human and/or novel  
341 ecological traits. Gene transfer events have led to the rise of virulent *V. cholerae* before, a great  
342 example being the rise of *V. cholerae* O139. The latter emerged in Bangladesh and India in 1992  
343 and is thought to have originated via genetic recombination of O-antigen region from a  
344 serogroup O22 strain to a serogroup O1 El Tor strain (45). After its emergence, *V. cholerae*  
345 O139 remained an important cause of widespread cholera epidemics in that region until 2004,  
346 along with *V. cholerae* O1 El Tor (45). Interestingly, it appears that among the accessory genes  
347 inferred as subject to HGT from VP to VC, genes encoding UDP-glucose 4-epimerase (EC  
348 5.1.3.2) and UDP-N-acetylgalactosaminyltransferase could be result of transfers in an ancestor of  
349 O139 strain MO10 from the *V. paracholerae* sp. nov. clade (**Fig. 6**). Both genes are involved in  
350 O-antigen biosynthesis and could be of significance in the emergence and evolution of *V.*  
351 *cholerae* O139 as a human pathogen and pandemic agent. Even though it will require further  
352 investigation to find out how and to what extent *V. paracholerae* sp. nov. as a species  
353 contributed to the emergence and evolution of *V. cholerae* O139, these transfer events could be



354 considered as examples of how interaction of this close relative with *V. cholerae* could impact  
355 the epidemiology of cholera.

356

## 357 **Conclusions**

358 Culture-independent analysis below the species level in inland cholera endemic and coastal non-  
359 endemic locations in distinct geographic settings identified differences in the population  
360 structures present in these environments. It revealed that human influences are likely to be a  
361 major factor shaping communities of that species in cholera endemic areas. In urban tropical  
362 Dhaka, found in inland Bangladesh, PG *V. cholerae* was abundant and continuously present, but  
363 accompanied by members of a related but phylogenetically distinct clade, which could represent  
364 a novel species. The abundance of this putative species, '*Vibrio paracholerae* sp. nov.', in Dhaka  
365 and its absence from Oyster Pond on the USA East Coast, indicates that it is not a ubiquitous  
366 member of aquatic communities. In addition to those identified here from the COVIS program in  
367 the USA and from Mozambique and Thailand, several strains of *Vibrio* spp. have been very  
368 recently isolated from clinical cases in China and Korea which would belong to this species  
369 according to the genome sequence similarities they share with strains analyzed here  
370 (**Supplementary Table 5**). An indirect association of their abundance with human population  
371 density indicates that they could be adapted to the human gut in cholera endemic areas (13).  
372 They could therefore occasionally become pathogenic by acquiring pathogenicity gene clusters  
373 or cause opportunistic infections in vulnerable individuals. The history, biology, genetic traits  
374 and coexistence with a pathogenic sister species makes it a risk as an emerging human pathogen.  
375 Its potential contribution to the evolution of new pathogenic variants of *V. cholerae* (such as PG  
376 lineage O139) and likely influence on their population structure highlights the importance of

377 studying this novel species in the context of a globally distributed infectious disease.

378

### 379 **Data availability**

380 The sequences reported in this article have been deposited in the NCBI database under bioproject  
381 number: [PRJNA598367](https://www.ncbi.nlm.nih.gov/bioproject/PRJNA598367).

382

### 383 **Acknowledgement**

384 This work was supported by the Natural Sciences and Engineering Research Council (NSERC)  
385 of Canada (to YB); the Integrated Microbial Biodiversity program of the Canadian Institute for  
386 Advanced Research (to YB); federal appropriations to the Centers for Disease Control and  
387 Prevention through the Advanced Molecular Detection Initiative (to CLT); and graduate student  
388 scholarships from Alberta Innovates – Technology Futures (to MTI), the NSERC Canada  
389 Graduate Scholarship – Doctoral Program (to TN), and the Bank of Montréal Financial Group  
390 (to FDO). The funders had no role in study design, data collection and interpretation, or the  
391 decision to submit the work for publication. The findings and conclusions in this report are those  
392 of the authors and do not necessarily represent the official position of the Centers for Disease  
393 Control and Prevention.

394 MA of icddr, b thanks the government of Bangladesh, Canada, Sweden and United Kingdom for  
395 providing unrestricted core support.

396

397 **Conflicts of interest**

398 The authors declare that there are no conflicts of interest.

399

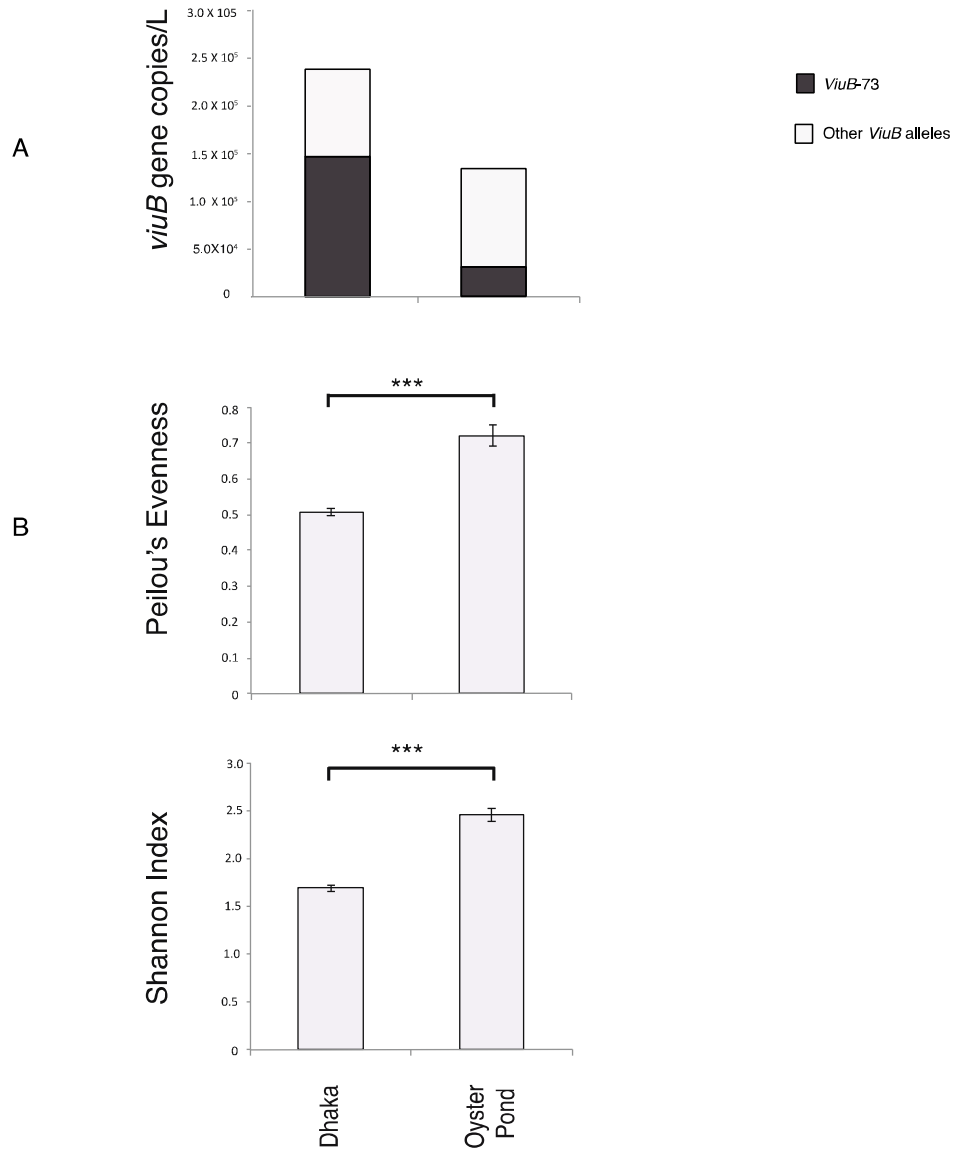

**Figure 1: Abundance and Diversity of *Vibrio cholerae* populations in two geographic locations: Dhaka and Oyster Pond.** A: Absolute average abundance of *V. cholerae* quantified

from qPCR data. Total height of the bar represents total *V. cholerae* (*viuB*), black segment represents *viuB-73* and clear segment represents other *viuB* alleles. B: Evenness and diversity of the two *V. cholerae* populations measured by Peilou's evenness and Shannon diversity indices based on analysis of *viuB* alleles. Statistical significance was measured by Kruskal-Wallis test; \*\*\*: statistically significant differences (Kruskal-Wallis  $p < 0.1$ ).

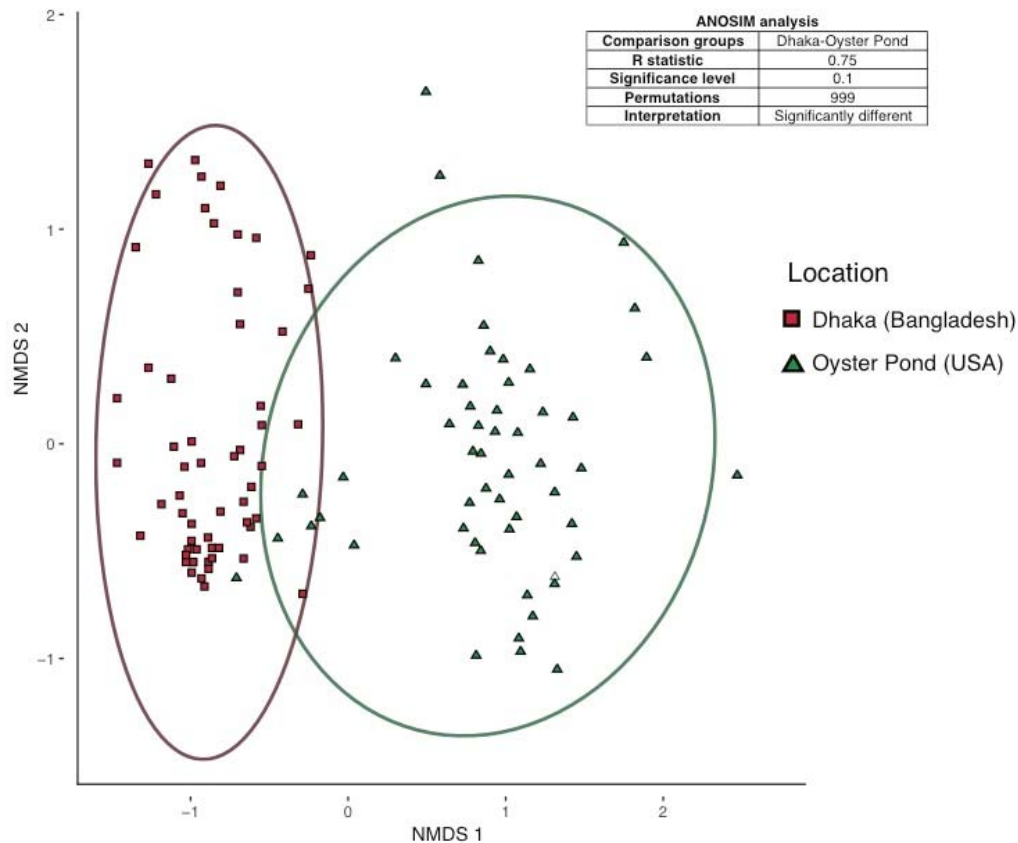

**Figure 2: Non-metric multi-dimensional scaling (NMDS) plot comparing beta diversity of *Vibrio cholerae* populations from two aquatic environments.** Population compositions were compared using Bray–Curtis dissimilarity matrix with ellipses representing 95% confidence intervals. Dataset was composed of *viuB* gene amplicon sequences normalized by qPCR copy numbers. NMDS plot (stress 0.16) shows distinct clustering of samples from the two locations shown along the first two axes labeled as NMDS1 and NMDS 2. Analyses of similarity (ANOSIM) results are displayed in the box inside the plot describing dissimilarity between pairs of samples from the two locations.

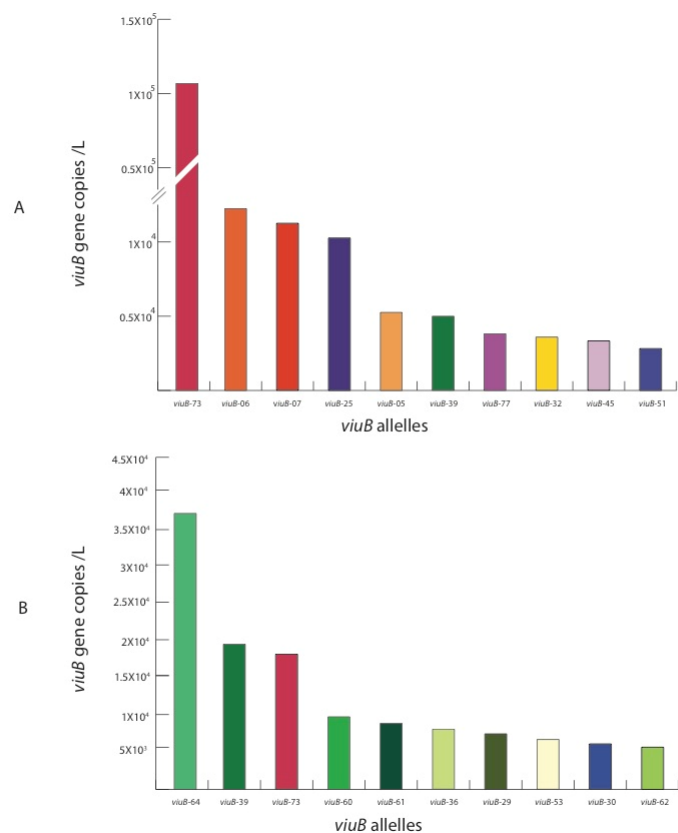

**Figure 3: Abundance of the most prevalent *viuB* alleles at two locations: A. Dhaka**

**(Bangladesh); B. Oyster Pond (USA).** Total *viuB* gene copy numbers were obtained by qPCR. Relative abundance of each allele was determined by amplicon sequencing. Specific colours were used for individual alleles to be consistent with the scheme described by Kirchberger (11). The ten most abundant alleles for each location were selected for comparison between the two locations.

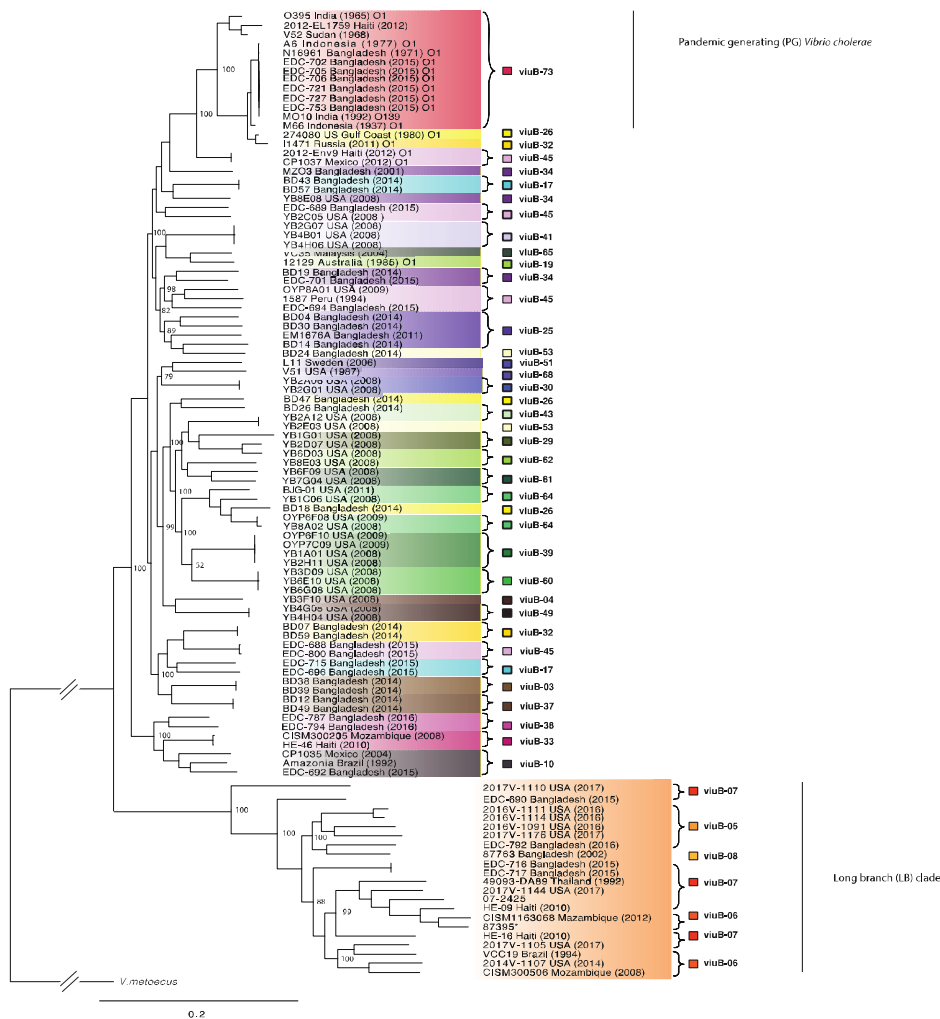

**Figure 4: Whole-genome phylogeny of *V. cholerae* strains found in Dhaka and Oyster Pond populations.** The phylogenetic tree was inferred using Parsnp v1.2 (46) based on the reference genome of *V. cholerae* O1 El Tor N16961, and includes representative strains from other

environments. Leaves of the tree were coloured according to the *viuB* allele found in that particular genome. Statistical support of relevant nodes was estimated by bootstrap analysis (1000 replicates, indicated as a percentage). The scale bar represents nucleotide substitutions per site.

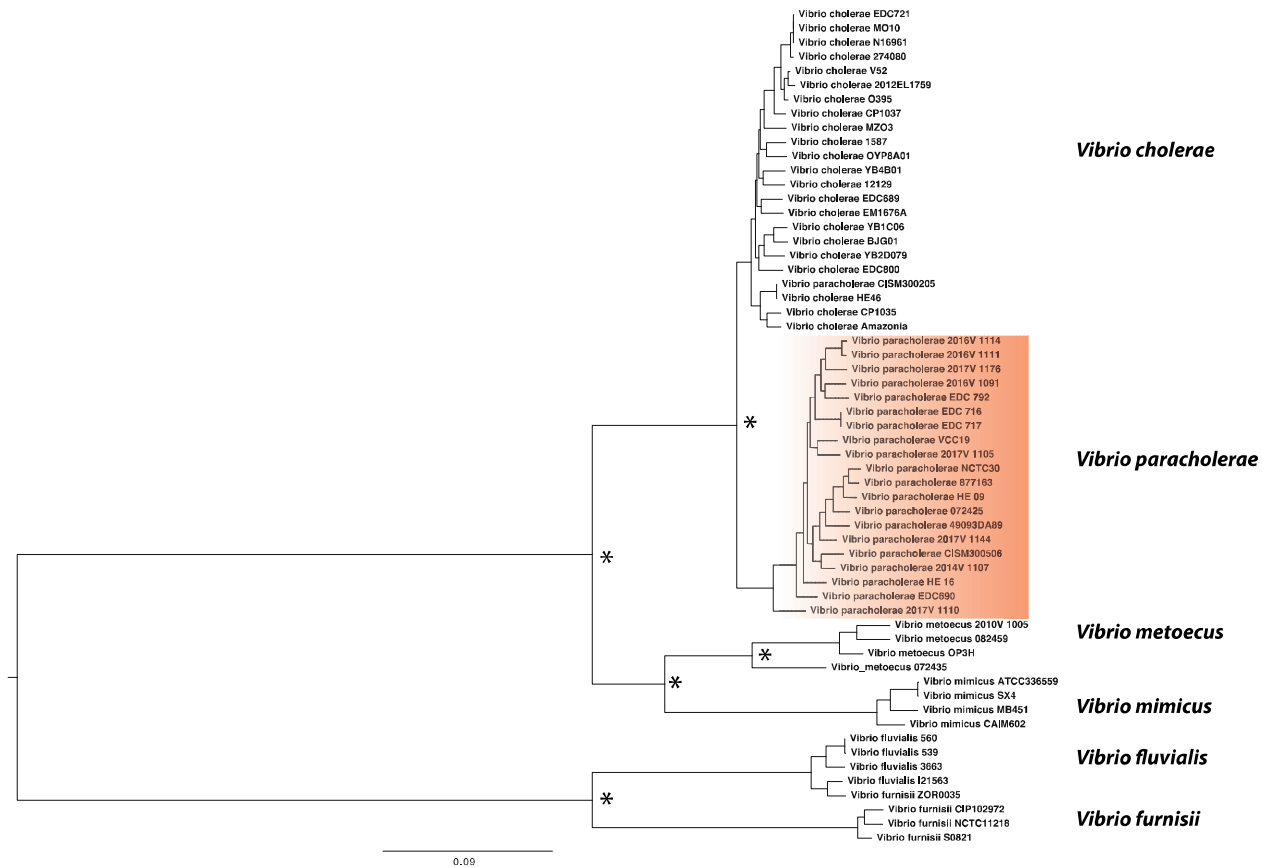

**Figure 5:** Whole-genome phylogenetic tree of *V. paracholerae* along with its closest sister species. The maximum likelihood phylogenetic tree was constructed from the core genome alignment of  $\approx 2.1$ M bp using GTR gamma substitution model. Corresponding nodes with relevant Bootstrap support over 70% from the 100 replicates were indicated with \*. The scale bar represents nucleotide substitutions per site.



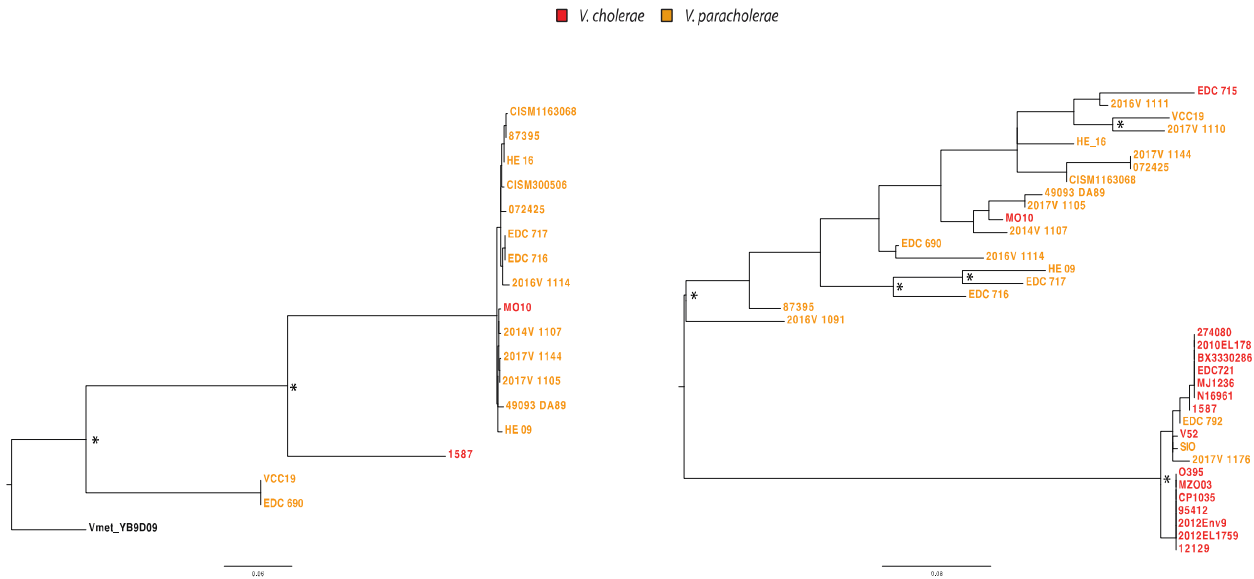

**Figure 6:** Phylogenetic tree of O-antigen cluster genes found in *V. paracholerae* and *V. cholerae*. Maximum likelihood trees were constructed using A) 705 bp nucleotide alignment of the gene encoding UDP-glucose 4-epimerase and B) 564 bp alignment of the gene encoding UDP-N-acetylgalactosaminyltransferase. Nodes with relevant Bootstrap support over 70 of 100 replicates are indicated with \*. The scale bar represents nucleotide substitutions per site.

| Phenotypic test              | <i>Vibrio paracholerae</i> sp. nov. |   |   |   | <i>Vibrio cholerae</i> |   |   |   | <i>Vibrio metoecus</i> |    |    |    |
|------------------------------|-------------------------------------|---|---|---|------------------------|---|---|---|------------------------|----|----|----|
|                              | 1                                   | 2 | 3 | 4 | 5                      | 6 | 7 | 8 | 9                      | 10 | 11 | 12 |
| $\alpha$ -cyclodextrin       | +                                   | + | + | + | -                      | - | - | - | +                      | +  | -  | +  |
| Pectin                       | +                                   | + | + | + | -                      | - | - | - | +                      | +  | +  | +  |
| Mono methyl succinate        | -                                   | - | + | - | +                      | + | + | + | -                      | -  | -  | -  |
| D-Mannose                    | -                                   | - | + | - | +                      | + | + | + | +                      | +  | +  | +  |
| L-aspartic acid              | -                                   | - | + | - | +                      | + | + | + | +                      | +  | +  | +  |
| Citric acid                  | -                                   | - | + | - | +                      | + | + | + | +                      | +  | +  | +  |
| $\alpha$ -keto glutaric acid | -                                   | - | + | + | +                      | + | + | + | -                      | -  | +  | -  |
| N-acetyl-D-galactosamine     | -                                   | - | - | - | -                      | - | - | - | +                      | +  | +  | +  |
| D-glucuronic acid            | -                                   | - | - | - | -                      | - | - | - | +                      | +  | +  | +  |
| Acetoin production           | +                                   | + | + | + | +                      | + | + | + | -                      | -  | -  | -  |

**Table 1: Phenotypic traits differentiating *Vibrio paracholerae* sp. nov. from its closest relatives *Vibrio cholerae* and *Vibrio metoecus*.** Strains: 1, EDC 792; 2, EDC 690; 3, 2016V-1111; 4, 2016V-1091; 5, N16961; 6, V52; 7, YB3B05; 8, YB8E08; 9, Vm 082459; 10, OP6B; 11, OP4B; 12, OP3H. +, Growth/positive test result; -, no growth/negative test result; ND, not determined. †Results for *V. cholerae* and *V. metoecus* strains were obtained from Kirchberger *et al* (7).

†Results for *V. cholerae* and *V. metoecus* strains were obtained from Kirchberger (7)

| Genomic Island/<br>Gene cluster    | Genomic position in reference genomes |                              | Present in % strains         |                                  |                              | Putative function                                                 | Reference  |
|------------------------------------|---------------------------------------|------------------------------|------------------------------|----------------------------------|------------------------------|-------------------------------------------------------------------|------------|
|                                    | N16961<br>(AE003852.1) locus          | NCTC30<br>(LS997868.1) locus | <i>V. Cholerae</i><br>(n=22) | <i>V. Paracholerae</i><br>(n=22) | <i>V. metoecus</i><br>(n=22) |                                                                   |            |
| RND efflux pump gene cluster       | Absent                                | 818-823                      | 0                            | 90                               | 0                            | Resistance to antimicrobials and heavy metals                     | This study |
| GI-66                              | Absent                                | 1923-1927                    | 0                            | 100                              | 0                            | Iron regulation                                                   | 42         |
| Cyclo-maltodextrin operon          | Absent                                | 3367-3375                    | 9                            | 100                              | 68                           | Cyclodextrin utilization                                          | 33         |
| VCA1102-1111 (N16961)              | VCA_1102-VCA_1111                     | Absent                       | 100                          | 0                                | 100                          | Fatty acid biosynthesis, Heme billiverdin, thermostable hemolysin | This study |
| Tor operon                         | VC_1692-VC_1694, VC_1719-VC_1720      | Absent                       | 100                          | 0                                | 100                          | Virulence gene regulation                                         | 65         |
| Gluthione regulated Potassium pump | VC_2606-VC_2607                       | Absent                       | 100                          | 0                                | 100                          | Potassium regulation                                              | This study |
| Beta lactamase                     | Absent                                | 3210                         | 0                            | 60                               | 0                            | Resistance to B-lactams                                           | 31         |
| manA-manP                          | VC_1820-VC_1827                       | 1534-1543                    | 68                           | 22                               | 100                          | Utilization of Mannose                                            | 35         |

**Table 2: Major genetic traits differentiating *Vibrio paracholerae* sp. nov. from its closest relatives: *Vibrio cholerae* and *Vibrio metoecus*. VC, *Vibrio cholerae*; VP, *Vibrio paracholerae* sp. nov.; VM, *Vibrio metoecus*. Reference genomes N16961 (*V. cholerae*) and NCTC30 (*V. paracholerae* sp. nov.) were used for determining locus positions of the gene clusters.**

## Materials and Methods

### Sample collection and processing

Environmental water samples were collected every two weeks between June 2015 and March

2016 from seven points along the water bodies surrounding Dhaka city, which is located in the central part of Bangladesh (23.8103° N, 90.4125° E). One-time water samples were collected from two natural coastal water bodies in Mathbaria (22.2920° N, 89.9580° E) and Kuakata (21.8210° N, 90.1214° E), which are geographically adjacent to the coast of the Bay of Bengal and approximately 200 km and 250 km southwest of Dhaka, respectively. One liter of water was collected from each sites in sterile Nalgene bottles placed in an insulated plastic box, and transported at ambient air temperature from the site of collection to the central laboratory of the International Center for Diarrheal Disease Research, Bangladesh (ICDDR,B), in Dhaka. Oyster pond sampling was performed at the same spots and approximates same time of the day in the pond and the nearby lagoon connected to the ocean in monthly intervals from June to October as described by Kirchberger (12). 50 liters of water were filtered through 0.22µm sterivex filters (Mo Bio Laboratories Inc., Carlsbad, CA, USA) for the collection of biomasses. Genomic DNA was extracted from the biomass using the protocol described by Wright (47).

### **Isolation and identification of isolates**

Bacterial isolates were recovered as described elsewhere (48). Briefly, water samples were enriched in APW (Difco Laboratories, Detroit, Mich.) at 37°C for 6 to 8 h before plating. About 5 µl of enriched APW broth was streaked, using an inoculating loop, onto both thiosulfate-citrate-bile-salts-sucrose (TCBS) and TTGA and incubated at 37°C for 18 to 24 h. Colonies with the characteristic appearance of *V. cholerae* were confirmed by standard biochemical and serological tests (and, in the case of the latter, by testing with polyvalent and monoclonal antibodies specific for *V. cholerae* O1 or O139) and, finally, by PCR.

## Phenotypic tests

For the comparison of phenotypic characteristics, Biolog phenotypic microarray plates PM1, PM2A, PM14A, PM16A, PM18C were used (49). Overnight cultured bacterial colonies were inoculated into Biolog IF-0a Base medium to reach 85 % turbidity followed by 1:200 dilution aliquoted into IF-10b medium supplemented with Dye Mix A as indicated by the manufacturer instructions. The mixture was then added into wells of Biolog PM1 and PM2A plate containing various carbon sources and PM14A, PM16A and PM18C plates containing substrates of various antimicrobials and heavy metal salts. The incubation and monitoring of the growth of inocula were done for 96 h in the presence of sole carbon source or the heavy metals, growth causes reduction of the dye, resulting in purple colour formation.

## Quantitative PCR (qPCR)

Estimation of *Vibrio cholerae* number was done using qPCR following the protocol described elsewhere (14). Briefly, Target probe for *viuB*, 5'-/56-FAM/TCATTTGGC/ZEN/CAGAGCATAAACCGGT/ 3IABkFQ/-3', forward primer 5'-TCGGTATTGTCTAACGGTAT-3', and reverse primer 5'-CGATTCGTGAGGGTGATA-3' was used. The volume of the PCR reaction was 10 µl containing 5 µl of 2× Dynamite qPCR master mix (MBSU, University of Alberta, Edmonton, Canada), 1 µl of each of 500 nM primer-250 nM probe mix, 1 µl of molecular grade water and 2 µl of DNA template. Real-time quantitative PCR was performed under the following conditions: initial primer activation at 95 °C for 2 min followed by 40 cycles of 95 °C for 15 s, 60 °C for 1 min in Illumina Eco Real-Time PCR system.

## Amplicon sequencing

Amplicon sequencing of *viuB* gene was performed following the method described elsewhere (11). To amplify 293 bp of the *viuB* region from DNA extracted from water samples, a touchdown PCR was performed using 0.5  $\mu$ L each of 10 pmol forward and reverse primers (for *viuB*: *viuB2f* 5'-CCGTTAGACAATACCGAGCAC-3' and *viuB5r* 5'-TTAGGATCGCGCACTAACCAC-3'), 0.4  $\mu$ L of 10 mM dNTP mix (ThermoFisher), 0.4  $\mu$ L Phire Hot Start II DNA Polymerase (ThermoFisher), 0.5  $\mu$ L of molecular biology grade bovine serum albumin (20 mg/mL, New England Biolabs), 5  $\mu$ L of 5 $\times$  Phire Buffer, and 2  $\mu$ L of template DNA. The PCR reaction was performed as follows: initial denaturation at 98°C for 4 min; followed by 10 cycles of denaturation at 98°C for 10 sec, annealing at 60°C for 6 sec (reduced by 1°C per cycle), and extension 72°C for 1 sec; followed by 23 cycles of denaturation at 98°C for 10 sec, annealing at 50°C for 6 sec (reduced by 1°C per cycle), and extension at 72°C for 1 sec; and a final extension at 72°C for 1 min. In preparation for sequencing, dual-indexed sequences were tagged using indices developed by Kozich (50) as follows: 2  $\mu$ L of preceding *viuB* PCR amplification reaction were used as template for a tagging PCR reaction; initial denaturation at 98°C for 30 sec; followed by two cycles of denaturation at 98°C for 10 sec, annealing at 55°C for 6 sec, and extension at 72°C for 1 sec; and final extension at 72°C for 1 min. Eight tagging reactions were performed for each sample and products were pooled and ran on a 2% agarose gel in 1 $\times$  Tris-Acetate-EDTA buffer. The appropriate bands (428 bp) were cut out of the gel. PCR products were then purified using Wizard SV Gel and PCR Clean-Up System (Promega) according to the instructions by the manufacturer. Concentration of clean PCR products was then measured using a Qubit Fluorometer (ThermoFisher) with a Qubit dsDNA HS Assay Kit (ThermoFisher) and pooled together in equal concentrations (>10 ng/ $\mu$ L). The pooled samples were then concentrated using a Wizard SV Gel

and PCR Clean-Up System (Promega). Quality control of the pooled and concentrated sample was done using an Agilent 2100 Bioanalyzer. Sequencing was performed using Illumina MiSeq technology with a v3 (600 cycles) reagent kit.

### **Amplicon sequence analysis**

De-multiplexed raw reads from the sequencing run were processed in R (51) using the DADA2 pipeline 1.4.0 (52). First 10 bp of forward and reverse reads were trimmed and reads with a maximum expected error rate  $>1$  was discarded. Chimera detection implemented in DADA2 was then performed on pooled samples. To account for the possibility of real chimeras between protein coding genes from closely related organisms (due to recombination or homoplastic mutations), chimeras were compared with a reference dataset of *viuB* alleles found in 782 sequenced *V. cholerae* genomes (obtained from GenBank). Only *viuB* alleles composed of more than 1,000 reads, found in multiple samples (with an average of 100,000 reads per sample) were considered for further analysis. Samples were rarefied to the level of the sample with the lowest reads using mothur 1.39.5 (53), and further analysis was performed in R, with statistical tests and distance calculations performed using the VEGAN 2.4-6 package (54). Bray-Curtis similarity was calculated based on relative read abundance of each allele in different samples in Primer-E Software Suite and used for similarity percentage (SIMPER) and non-metric multi dimensional scaling (NMDS) analysis.

### **Whole-genome sequencing and core genome phylogeny**

The genomes of 23 strains from Dhaka belonging to various *viuB* genotypes were chosen for whole-genome sequencing as described by Orata (8). Sequencing libraries were prepared from the

genomic DNA using the Nextera XT DNA library preparation kit (Illumina, San Diego, CA, USA) and sequenced using Illumina MiSeq sequencing platforms (2××250-bp paired-end reads). Quality control and *de novo* assembly of the reads were done using default parameters in CLC Genomics workbench 7 (Qiagen). Whole-genome alignment was performed using Mugsy v1.2.3 (55) with default parameters, and a maximum likelihood tree was built from this alignment using RaxML v8 (56) under the GTR+GAMMA model with 100 bootstrap replicates. Additional *V. cholerae* genomes were downloaded from GenBank. The maximum likelihood phylogenomic tree was constructed from the alignment of locally collinear blocks (2,094,734 bp) using GTR gamma substitution model with 100 bootstrap replicates.

### **Comparative genomic analysis**

The genome sequences were annotated with RAST 2.0 (57). Genomic distances were calculated in Geneious (58). Core and accessory genes were determined with BPGA finding orthologous protein-coding genes clustered into families based on a 30% amino acid sequence identity (59). Group specific genes were clustered using a custom-made Python program.

### References:

1. Ali M, Lopez AL, Ae You Y, Eun Kim Y, Sah B, Maskery B, Clemens J. 2012. The global burden of cholera. Bull World Health Organ <https://doi.org/10.2471/blt.11.093427>.
2. Kaper JB, Morris Jr. JG, Levine MM. 1995. Cholera. Clin Microbiol Rev 8:48–86.
3. Davis BR, Fanning GR, Madden JM, Steigerwalt AG, Bradford HB, Smith HL, Brenner



- DJ. 1981. Characterization of biochemically atypical *Vibrio cholerae* strains and designation of a new pathogenic species, *Vibrio mimicus*. *J Clin Microbiol* <https://doi.org/10.1128/jcm.14.6.631-639.1981>.
4. Hasan NA, Grim CJ, Haley BJ, Chun J, Alam M, Taviani E, Hoq M, Munk AC, Saunders E, Brettin TS, Bruce DC, Challacombe JF, Detter JC, Han CS, Xie G, Nair GB, Huq A, Colwell RR. 2010. Comparative genomics of clinical and environmental *Vibrio mimicus*. *Proc Natl Acad Sci U S A* <https://doi.org/10.1073/pnas.1013825107>.
  5. Neogi SB, Chowdhury N, Awasthi SP, Asakura M, Okuno K, Mahmud ZH, Islam MS, Hinenoya A, Nair GB, Yamasaki S. 2019. Novel cholera toxin variant and ToxT regulon in environmental *Vibrio mimicus* isolates: Potential resources for the evolution of *Vibrio cholerae* hybrid strains. *Appl Environ Microbiol* <https://doi.org/10.1128/AEM.01977-18>.
  6. Haley BJ, Grim CJ, Hasan NA, Choi SY, Chun J, Brettin TS, Bruce DC, Challacombe JF, Detter JC, Han CS, Huq A, Colwell RR. 2010. Comparative genomic analysis reveals evidence of two novel *Vibrio* species closely related to *V. cholerae*. *BMC Microbiol* <https://doi.org/10.1186/1471-2180-10-154>.
  7. Kirchberger PC, Turnsek M, Hunt DE, Haley BJ, Colwell RR, Polz MF, Tarr CL, Boucher Y. 2014. *Vibrio metoecus* sp. nov., a close relative of *Vibrio cholerae* isolated from coastal brackish ponds and clinical specimens. *Int J Syst Evol Microbiol* 64:3208–3214.
  8. Orata FD, Kirchberger PC, Méheust R, Jed Barlow E, Tarr CL, Boucher Y. 2015. The dynamics of genetic interactions between *Vibrio metoecus* and *Vibrio cholerae*, two close relatives co-occurring in the environment. *Genome Biol Evol* <https://doi.org/10.1093/gbe/evv193>.

9. Chun J, Grim CJ, Hasan NA, Lee JH, Choi SY, Haley BJ, Taviani E, Jeon YS, Kim DW, Lee JH, Brettin TS, Bruce DC, Challacombe JF, Detter JC, Han CS, Munk AC, Chertkov O, Meincke L, Saunders E, Walters RA, Huq A, Nair GB, Colwell RR. 2009. Comparative genomics reveals mechanism for short-term and long-term clonal transitions in pandemic *Vibrio cholerae*. *Proc Natl Acad Sci U S A* 106:15442–15447.
10. Islam MT, Alam M, Boucher Y. 2017. Emergence, ecology and dispersal of the pandemic generating *Vibrio cholerae* lineage. *Int Microbiol* 20:106–115.
11. Kirchberger PC, Orata FD, Nasreen T, Kauffman KM, Tarr CL, Case RJ, Polz MF, Boucher YF. 2020. Culture-independent tracking of *Vibrio cholerae* lineages reveals complex spatiotemporal dynamics in a natural population. *Env Microbiol* <https://doi.org/10.1111/1462-2920.14921>.
12. Kirchberger PC, Orata FD, Barlow EJ, Kauffman KM, Case RJ, Polz MF, Boucher Y. 2016. A Small Number of Phylogenetically Distinct Clonal Complexes Dominate a Coastal *Vibrio cholerae* Population. *Appl Env Microbiol* 82:5576–5586.
13. Tania Nasreen, Mohammad Tarequl Islam, Kevin Y. H. Liang, Fatema-Tuz Johura, Paul C. Kirchberger, Marzia Sultana, Rebecca J. Case MA and YFB. Environmental factors influence subspecies population structure of *Vibrio cholerae* in Dhaka, Bangladesh. Unpublished.
14. Nasreen T, Hussain NAS, Islam MT, Orata FD, Kirchberger PC, Case RJ, Alam M, Yanow SK, Boucher YF. 2020. Simultaneous quantification of *vibrio metoecus* and *vibrio cholerae* with its o1 serogroup and toxigenic subpopulations in environmental reservoirs. *Pathogens* <https://doi.org/10.3390/pathogens9121053>.

15. Rafique R, Rashid MU, Monira S, Rahman Z, Mahmud MT, Mustafiz M, Saif-Ur-Rahman KM, Johura FT, Islam S, Parvin T, Bhuyian MS, Sharif MB, Rahman SR, Sack DA, Sack RB, George CM, Alam M. 2016. Transmission of Infectious *Vibrio cholerae* through Drinking Water among the Household Contacts of Cholera Patients (CHoBI7 Trial). *Front Microbiol* 7:1635.
16. Shapiro BJ, Levade I, Kovacicova G, Taylor RK, Almagro-Moreno S. 2016. Origins of pandemic *Vibrio cholerae* from environmental gene pools. *Nat Microbiol* 2:16240.
17. Unterweger D, Miyata ST, Bachmann V, Brooks TM, Mullins T, Kostiuk B, Provenzano D, Pukatzki S. 2014. The *Vibrio cholerae* type VI secretion system employs diverse effector modules for intraspecific competition. *Nat Commun* 5:3549.
18. Nora Hussein, Paul Kirchberger YFB. Type six secretion mediated competition in *Vibrio cholerae*. Unpublished.
19. Islam MT, Liang K, Im MS, Winkjer J, Busby S, Tarr CL, Boucher Y. 2018. Draft Genome Sequences of Nine *Vibrio* sp. Isolates from across the United States Closely Related to *Vibrio cholerae*. *Microbiol Resour Announc* 7.
20. Garrine M, Mandomando I, Vubil D, Nhampossa T, Acacio S, Li S, Paulson JN, Almeida M, Domman D, Thomson NR, Alonso P, Stine OC. 2017. Minimal genetic change in *Vibrio cholerae* in Mozambique over time: Multilocus variable number tandem repeat analysis and whole genome sequencing. *PLoS Negl Trop Dis* 11:e0005671.
21. Bishop-Lilly KA, Johnson SL, Verratti K, Luu T, Khiani A, Awosika J, Mokashi VP, Chain PS, Sozhamannan S. 2014. Genome sequencing of 15 clinical *Vibrio* isolates, including 13 non-o1/non-o139 serogroup strains. *Genome Announc* 2.

22. Auch AF, von Jan M, Klenk HP, Goker M. 2010. Digital DNA-DNA hybridization for microbial species delineation by means of genome-to-genome sequence comparison. *Stand Genomic Sci* 2:117–134.
23. Ciufu S, Kannan S, Sharma S, Badretdin A, Clark K, Turner S, Brover S, Schoch CL, Kimchi A, DiCuccio M. 2018. Using average nucleotide identity to improve taxonomic assignments in prokaryotic genomes at the NCBI. *Int J Syst Evol Microbiol* 68:2386–2392.
24. Richter M, Rossello-Mora R. 2009. Shifting the genomic gold standard for the prokaryotic species definition. *Proc Natl Acad Sci U S A* 106:19126–19131.
25. Dorman MJ, Kane L, Domman D, Turnbull JD, Cormie C, Fazal MA, Goulding DA, Russell JE, Alexander S, Thomson NR. 2019. The history, genome and biology of NCTC 30: A non-pandemic *Vibrio cholerae* isolate from World War One. *Proc R Soc B Biol Sci* <https://doi.org/10.1098/rspb.2018.2025>.
26. Gardner AD, Venkatraman K V. 1935. The antigens of the cholera group of vibrios. *J Hyg (Lond)* <https://doi.org/10.1017/S0022172400032265>.
27. Fiedler G, Pajatsch M, Böck A. 1996. Genetics of a novel starch utilisation pathway present in *Klebsiella oxytoca*. *J Mol Biol* <https://doi.org/10.1006/jmbi.1996.0085>.
28. DAVIS GH, PARK RW. 1962. A taxonomic study of certain bacteria currently classified as *Vibrio* species. *J Gen Microbiol* <https://doi.org/10.1099/00221287-27-1-101>.
29. Sun T, Altenbuchner J. 2010. Characterization of a mannose utilization system in *Bacillus subtilis*. *J Bacteriol* <https://doi.org/10.1128/JB.01673-09>.
30. Lee KM, Park Y, Bari W, Yoon MY, Go J, Kim SC, Lee H Il, Yoon SS. 2012. Activation of cholera toxin production by anaerobic respiration of trimethylamine N-oxide in *Vibrio*

cholerae. J Biol Chem <https://doi.org/10.1074/jbc.M112.394932>.

31. Lin W, Fullner KJ, Clayton R, Sexton JA, Rogers MB, Calia KE, Calderwood SB, Fraser C, Mekalanos JJ. 1999. Identification of a vibrio cholerae RTX toxin gene cluster that is tightly linked to the cholera toxin prophage. Proc Natl Acad Sci U S A <https://doi.org/10.1073/pnas.96.3.1071>.
32. Dziejman M, Serruto D, Tam VC, Sturtevant D, Diraphat P, Faruque SM, Rahman MH, Heidelberg JF, Decker J, Li L, Montgomery KT, Grills G, Kucherlapati R, Mekalanos JJ. 2005. Genomic characterization of non-O1, non-O139 Vibrio cholerae reveals genes for a type III secretion system. Proc Natl Acad Sci U S A <https://doi.org/10.1073/pnas.0409918102>.
33. Mutreja A, Kim DW, Thomson N, Connor TR, Hee J, Lebens M, Niyogi SK, Kim EJ, Ramamurthy T, Chun J, Parkhill J, Dougan G. 2013. Evidence for multiple waves of global transmission within the seventh cholera pandemic. Nature <https://doi.org/10.1038/nature10392>.Evidence.
34. Lugo MR, Merrill AR. 2015. The father, son and cholix toxin: The third member of the DT group mono-ADP-ribosyltransferase toxin family. Toxins (Basel).
35. Choi SY, Rashed SM, Hasan NA, Alam M, Islam T, Sadique A, Johura FT, Eppinger M, Ravel J, Huq A, Cravioto A, Colwell RR. 2016. Phylogenetic diversity of vibrio cholerae associated with endemic cholera in Mexico from 1991 to 2008. MBio <https://doi.org/10.1128/mBio.02160-15>.
36. Payne SM, Mey AR, Wyckoff EE. 2016. Vibrio Iron Transport: Evolutionary Adaptation to Life in Multiple Environments. Microbiol Mol Biol Rev

<https://doi.org/10.1128/membr.00046-15>.

37. Bina XR, Provenzano D, Nguyen N, Bina JE. 2008. *Vibrio cholerae* RND family efflux systems are required for antimicrobial resistance, optimal virulence factor production, and colonization of the infant mouse small intestine. *Infect Immun*  
<https://doi.org/10.1128/IAI.01620-07>.
38. Trastoy R, Manso T, Fernández-García L, Blasco L, Ambroa A, Pérez Del Molino ML, Bou G, García-Contreras R, Wood TK, Tomás M. 2018. Mechanisms of bacterial tolerance and persistence in the gastrointestinal and respiratory environments. *Clin Microbiol Rev*.
39. Routh MD, Zalucki Y, Su CC, Long F, Zhang Q, Shafer WM, Yu EW. 2010. Efflux pumps of the Resistance-nodulation-division family: A perspective of their structure, function, and regulation in gram-negative bacteria. *Adv Enzymol Relat Areas Mol Biol*  
<https://doi.org/10.1002/9780470920541.ch3>.
40. Brayton PR, Bode RB, Colwell RR, MacDonell MT, Hall HL, Grimes DJ, West PA, Bryant TN. 1986. *Vibrio cincinnatiensis* sp. nov., a new human pathogen. *J Clin Microbiol*  
<https://doi.org/10.1128/jcm.23.1.104-108.1986>.
41. Zheng B, Jiang X, Cheng H, Guo L, Zhang J, Xu H, Yu X, Huang C, Ji J, Ying C, Feng Y, Xiao Y, Li L. 2017. Genome characterization of two bile-isolated *Vibrio fluvialis* strains: An insight into pathogenicity and bile salt adaptation. *Sci Rep*  
<https://doi.org/10.1038/s41598-017-12304-8>.
42. Polz MF, Alm EJ, Hanage WP. 2013. Horizontal gene transfer and the evolution of bacterial and archaeal population structure. *Trends Genet*.
43. Schliep K, Lopez P, Lapointe FJ, Baptiste É. 2011. Harvesting evolutionary signals in a

- forest of prokaryotic gene trees. *Mol Biol Evol* <https://doi.org/10.1093/molbev/msq323>.
44. Wiedenbeck J, Cohan FM. 2011. Origins of bacterial diversity through horizontal genetic transfer and adaptation to new ecological niches. *FEMS Microbiol Rev*.
  45. Faruque SM, Sack DA, Sack RB, Colwell RR, Takeda Y, Nair GB. 2003. Emergence and evolution of *Vibrio cholerae* O139. *Proc Natl Acad Sci U S A* <https://doi.org/10.1073/pnas.0337468100>.
  46. Treangen TJ, Ondov BD, Koren S, Phillippy AM. 2014. The harvest suite for rapid core-genome alignment and visualization of thousands of intraspecific microbial genomes. *Genome Biol* <https://doi.org/10.1186/s13059-014-0524-x>.
  47. Wright JJ, Lee S, Zaikova E, Walsh DA, Hallam SJ. 2009. DNA extraction from 0.22  $\mu$ M Sterivex filters and cesium chloride density gradient centrifugation. *J Vis Exp* <https://doi.org/10.3791/1352>.
  48. Alam M, Islam A, Bhuiyan NA, Rahim N, Hossain A, Khan GY, Ahmed D, Watanabe H, Izumiya H, Faruque AS, Akanda AS, Islam S, Sack RB, Huq A, Colwell RR, Cravioto A. 2011. Clonal transmission, dual peak, and off-season cholera in Bangladesh. *Infect Ecol Epidemiol* 1.
  49. Bochner BR, Gadzinski P, Panomitros E. 2001. Phenotype Microarrays for high-throughput phenotypic testing and assay of gene function. *Genome Res* <https://doi.org/10.1101/gr.186501>.
  50. Kozich JJ, Westcott SL, Baxter NT, Highlander SK, Schloss PD. 2013. Development of a dual-index sequencing strategy and curation pipeline for analyzing amplicon sequence data on the miseq illumina sequencing platform. *Appl Environ Microbiol*

<https://doi.org/10.1128/AEM.01043-13>.

51. R Development Core Team R. 2011. R: A Language and Environment for Statistical ComputingR Foundation for Statistical Computing.
52. Callahan BJ, McMurdie PJ, Rosen MJ, Han AW, Johnson AJA, Holmes SP. 2016. DADA2: High-resolution sample inference from Illumina amplicon data. *Nat Methods* <https://doi.org/10.1038/nmeth.3869>.
53. Schloss PD, Westcott SL, Ryabin T, Hall JR, Hartmann M, Hollister EB, Lesniewski RA, Oakley BB, Parks DH, Robinson CJ, Sahl JW, Stres B, Thallinger GG, Van Horn DJ, Weber CF. 2009. Introducing mothur: Open-source, platform-independent, community-supported software for describing and comparing microbial communities. *Appl Environ Microbiol* <https://doi.org/10.1128/AEM.01541-09>.
54. Oksanen J, Kindt R, Legendre P, O'Hara B, Simpson GL, Solymos PM, Stevens MHH, & Wagner H. 2008. The vegan package. *Community Ecol Packag*.
55. Angiuoli S V., Salzberg SL. 2011. Mugsy: Fast multiple alignment of closely related whole genomes. *Bioinformatics* <https://doi.org/10.1093/bioinformatics/btq665>.
56. Stamatakis A. 2014. RAxML version 8: A tool for phylogenetic analysis and post-analysis of large phylogenies. *Bioinformatics* <https://doi.org/10.1093/bioinformatics/btu033>.
57. Aziz RK, Bartels D, Best A, DeJongh M, Disz T, Edwards RA, Formsma K, Gerdes S, Glass EM, Kubal M, Meyer F, Olsen GJ, Olson R, Osterman AL, Overbeek RA, McNeil LK, Paarmann D, Paczian T, Parrello B, Pusch GD, Reich C, Stevens R, Vassieva O, Vonstein V, Wilke A, Zagnitko O. 2008. The RAST Server: Rapid annotations using subsystems technology. *BMC Genomics* <https://doi.org/10.1186/1471-2164-9-75>.



58. Kearse M, Moir R, Wilson A, Stones-Havas S, Cheung M, Sturrock S, Buxton S, Cooper A, Markowitz S, Duran C, Thierer T, Ashton B, Meintjes P, Drummond A. 2012. Geneious Basic: An integrated and extendable desktop software platform for the organization and analysis of sequence data. *Bioinformatics* <https://doi.org/10.1093/bioinformatics/bts199>.
59. Chaudhari NM, Gupta VK, Dutta C. 2016. BPGA-an ultra-fast pan-genome analysis pipeline. *Sci Rep* <https://doi.org/10.1038/srep24373>.
